# Supplementary material for: Deep sequencing of HetR-bound DNA reveals novel HetR targets in Anabaena sp. strain PCC7120
Source: PubMed Central journal article supplement (PMC4192349; doi:10.1186/s12866-014-0255-x), 2014-10-03
Supplement: 12866_2014_255_MOESM1_ESM.pdf [file 12866_2014_255_MOESM1_ESM.pdf]

**Additional Table 1. HetR ChIP Peaks.**

| Region              | Length | FDR (%)  | # Reads | # Forward reads | # Reverse reads | Normalized difference | Wilcoxon filter p-value | 5' gene       | 3' gene        | Overlapping annotations                                                                                                                                                                                                                                                   |
|---------------------|--------|----------|---------|-----------------|-----------------|-----------------------|-------------------------|---------------|----------------|---------------------------------------------------------------------------------------------------------------------------------------------------------------------------------------------------------------------------------------------------------------------------|
| +(136127..136558)   | 431    | 4.755639 | 54      | 23              | 31              | 0.14814815            | 0.14100388              | all0131 (223) | alr0132 (64)   |                                                                                                                                                                                                                                                                           |
| +(374646..375090)   | 444    | 0.421362 | 112     | 69              | 43              | 0.23214286            | 0.01353232              | all0326 (145) | all0327        | all0327, all0327, Glutamine amidotransferases class-II (Gn-AT)_YafJ-type. YafJ is a glutamine amidotransferase-like protein of unknown function found in prokaryotes, eukaryotes and archaea. YafJ has a conserved structural fold similar to those of other class II...; |
| +(613436..613919)   | 483    | 1.51E-07 | 385     | 218             | 167             | 0.13246753            | 0.06926288              | alr0520 (881) | patA           | patA, patA                                                                                                                                                                                                                                                                |
| +(645374..645809)   | 435    | 3.868301 | 25      | 18              | 7               | 0.44                  | 0.00774085              | alr0553       | alr0554 (114)  | alr0553, alr0553, Integrase core domain; Region: rve; cl01316                                                                                                                                                                                                             |
| +(801575..802006)   | 431    | 3.35602  | 313     | 145             | 168             | 0.07348243            | 0.27343214              | hypF          | hupC (999)     | hypF, hypF, Hydrogenase maturation factor [Posttranslational modification, protein turnover, chaperones]; Region: HypF; COG0068, yrdC domain; Region: cl09168                                                                                                             |
| +(1170772..1171203) | 431    | 3.868301 | 89      | 42              | 47              | 0.05617978            | 0.48688744              | alr0999       | alr1000 (745)  | alr0999, alr0999, Transposase DDE domain; Region: Transposase_11; cl09168                                                                                                                                                                                                 |
| +(1729122..1729569) | 447    | 0.133137 | 239     | 115             | 124             | 0.0376569             | 0.00023451              | nifs (12385)  | fdxN           | fdxN, all1467, fdxN, all1467                                                                                                                                                                                                                                              |
| +(1732738..1733693) | 955    | 8.58E-30 | 1787    | 880             | 907             | 0.01510912            | 0.24284409              | nifs (16001)  | fdxN           | fdxN, asr1469, alr1470, fdxN, asr1469, alr1470                                                                                                                                                                                                                            |
| +(1734763..1735224) | 461    | 0.313089 | 70      | 36              | 34              | 0.02857143            | 0.96390246              | nifs (18026)  | fdxN           | fdxN, all1471, all1472, fdxN, all1471, all1472                                                                                                                                                                                                                            |
| +(1788499..1788932) | 433    | 3.321759 | 46      | 24              | 22              | 0.04347826            | 0.00030131              | alr1527       | alr1528 (1314) | alr1527, alr1527                                                                                                                                                                                                                                                          |
| +(1890160..1890654) | 494    | 6.02E-58 | 1333    | 710             | 623             | 0.06526632            | 5.0436E-11              | alr1607 (667) | all1608        | all1608, alr1609, all1608, alr1609, Probable transposase; Region: Transposase_2; pfam01385, Transposase and inactivated derivatives [DNA replication, recombination, and repair];                                                                                         |

|                         |     |          |      |      |      |            |            |                 |                  |                                                                                                                                                                                       |
|-------------------------|-----|----------|------|------|------|------------|------------|-----------------|------------------|---------------------------------------------------------------------------------------------------------------------------------------------------------------------------------------|
| +(1890763.<br>.1891564) | 801 | 6.9E-57  | 2654 | 1279 | 1375 | 0.03617182 | 0.97186731 | alr1609         | all1610<br>(610) | alr1609, alr1609, Transposase and inactivated derivatives [DNA replication, recombination, and repair]; Region: COG3464, Transposase; Region: Transposase 12: pfam01610               |
| +(2075925.<br>.2076785) | 860 | 7.53E-13 | 208  | 98   | 110  | 0.05769231 | 0.00022777 | alr1726         | alr1727          | alr1726, alr1727, alr1726, alr1727, Transposase and inactivated derivatives [DNA replication, recombination, and repair]; Region: COG3415, Integrase core domain; Region: rna_6101316 |
| +(2216679.<br>.2217151) | 472 | 3.868301 | 9    | 5    | 4    | 0.11111111 | 0.992      | alr1852<br>(33) | alr1853          | alr1853, alr1853, Transposase and inactivated derivatives [DNA replication, recombination, and repair]; Region: COG3415                                                               |

|                         |     |          |     |     |     |            |            |                  |                 |                                                                                                                                                                                                                                                                                                                                                                                                                                                                                                                                                                                                                                                                                                                                                                                                                                                                                                                                                                                                                                    |
|-------------------------|-----|----------|-----|-----|-----|------------|------------|------------------|-----------------|------------------------------------------------------------------------------------------------------------------------------------------------------------------------------------------------------------------------------------------------------------------------------------------------------------------------------------------------------------------------------------------------------------------------------------------------------------------------------------------------------------------------------------------------------------------------------------------------------------------------------------------------------------------------------------------------------------------------------------------------------------------------------------------------------------------------------------------------------------------------------------------------------------------------------------------------------------------------------------------------------------------------------------|
| +(2274728.<br>.2275590) | 862 | 1.16E-09 | 151 | 72  | 79  | 0.04635762 | 0.00838309 | alr1903          | cyaB2<br>(1910) | alr1903, alr1903, FOG: HEAT repeat [Energy production and conversion]; Region: COG1413, Armadillo/beta-catenin-like repeats. An approximately 40 amino acid long tandemly repeated sequence motif first identified in the Drosophila segment polarity gene armadillo; these repeats were also found in the mammalian armadillo homolog beta-catenin...; Region: ARM; cd00020, protein binding surface; other site, Armadillo/beta-catenin-like repeats. An approximately 40 amino acid long tandemly repeated sequence motif first identified in the Drosophila segment polarity gene armadillo; these repeats were also found in the mammalian armadillo homolog beta-catenin...; Region: ARM; cd00020, FOG: HEAT repeat [Energy production and conversion]; Region: COG1413, protein binding surface; other site, Armadillo/beta-catenin-like repeats. An approximately 40 amino acid long tandemly repeated sequence motif first identified in the Drosophila segment polarity gene armadillo; these repeats were also found in |
| +(2427714.<br>.2428147) | 433 | 0.006271 | 276 | 144 | 132 | 0.04347826 | 0.79166253 | all2026<br>(487) | all2027         | all2027, asl2028, all2029, all2027, asl2028, all2029                                                                                                                                                                                                                                                                                                                                                                                                                                                                                                                                                                                                                                                                                                                                                                                                                                                                                                                                                                               |

|                         |     |          |      |      |      |            |            |                  |                   |                                                                                                                                                                                                                                                                                                                                                                                                                               |
|-------------------------|-----|----------|------|------|------|------------|------------|------------------|-------------------|-------------------------------------------------------------------------------------------------------------------------------------------------------------------------------------------------------------------------------------------------------------------------------------------------------------------------------------------------------------------------------------------------------------------------------|
| +(2691579.<br>.2692024) | 445 | 0.401938 | 332  | 162  | 170  | 0.02409639 | 5.1292E-14 | all2239<br>(199) | alr2240           | alr2240, alr2240, Signal receiver domain; originally thought to be unique to bacteria (CheY, OmpR, NtrC, and PhoB), now recently identified in eukaryotes ETR1 Arabidopsis thaliana; this domain receives the signal from the sensor partner in a two-component systems...; Region: REC; cd00156, active site, phosphorylation site, intermolecular recognition site; other site, dimerization interface; other               |
| +(2693489.<br>.2693944) | 455 | 0.679439 | 81   | 47   | 34   | 0.16049383 | 0.00502315 | alr2241<br>(108) | alr2242           | alr2242, alr2242, Predicted NTPase (NACHT family) [Signal transduction mechanisms]; Region: COG5635                                                                                                                                                                                                                                                                                                                           |
| +(2706756.<br>.2707187) | 431 | 3.868301 | 52   | 26   | 26   | 0          | 0.99990556 | gvpA<br>(89)     | asr2255           | asr2255, asr2255, Inositol polyphosphate kinase; Region: IPK; cl12283                                                                                                                                                                                                                                                                                                                                                         |
| +(2820376.<br>.2821054) | 678 | 0        | 2977 | 1762 | 1215 | 0.18374202 | 0.98777893 | alr2338          | hetR<br>(583)     | alr2338, alr2338, EamA-like transporter family; Region: EamA; cl01037                                                                                                                                                                                                                                                                                                                                                         |
| +(2821271.<br>.2822006) | 735 | 0        | 7395 | 3700 | 3695 | 0.00067613 | 0.99998352 | alr2338<br>(582) | hetR              | hetR, hetR, Peptidase family S48; Region: Peptidase_S48; cl11616                                                                                                                                                                                                                                                                                                                                                              |
| +(2822194.<br>.2822924) | 730 | 0        | 4561 | 2247 | 2314 | 0.01468976 | 0.00086557 | hetR             | all2340           | hetR, all2340, hetR, all2340, Peptidase family S48; Region: Peptidase_S48; cl11616, aspartate aminotransferase; Provisional; Region: PRK07681, Aspartate aminotransferase family. This family belongs to pyridoxal phosphate (PLP)-dependent aspartate aminotransferase superfamily (fold I). Pyridoxal phosphate combines with an alpha-amino acid to form a compound called a Schiff base or aldimine...; Region: AAT like; |
| +(3262532.<br>.3262973) | 441 | 0.401938 | 127  | 56   | 71   | 0.11811024 | 0.25919671 | alr2680          | all2681<br>(4507) | alr2680, alr2680, Polyketide synthase modules and related proteins [Secondary metabolites biosynthesis, transport, and catabolism]; Region: COG3321, PKS_DH; Region: PKS_DH; smart00826                                                                                                                                                                                                                                       |

|                         |      |          |      |      |      |            |            |                 |                   |                                                                                                                                                                                                                                                                                                                |
|-------------------------|------|----------|------|------|------|------------|------------|-----------------|-------------------|----------------------------------------------------------------------------------------------------------------------------------------------------------------------------------------------------------------------------------------------------------------------------------------------------------------|
| +(3287842.<br>.3289794) | 1952 | 0        | 5904 | 2934 | 2970 | 0.00609756 | 1.1211E-10 | alr2697         | alr2698           | alr2697, alr2698, alr2697, alr2698,<br>Transposase and inactivated derivatives<br>[DNA<br>replication, recombination, and repair];<br>Region: COG3464, Transposase; Region:<br>Transposase_12; pfam01610                                                                                                       |
| +(3431297.<br>.3432038) | 741  | 1.54E-09 | 349  | 177  | 172  | 0.01432665 | 7.5789E-13 | hetC<br>(99)    | hetP<br>(325)     |                                                                                                                                                                                                                                                                                                                |
| +(3627499.<br>.3627977) | 478  | 1.22E-12 | 161  | 72   | 89   | 0.10559006 | 0.79079616 | alr2986         | alr2987<br>(2059) | alr2986, alr2986, FOG: HEAT repeat [Energy<br>production and<br>conversion]; Region: COG1413                                                                                                                                                                                                                   |
| +(3695599.<br>.3696450) | 851  | 1.73E-54 | 1418 | 696  | 722  | 0.01833568 | 0.3610782  | asr3053         | all3054           | asr3053, all3054, asr3053, all3054,<br>Uncharacterized protein conserved in<br>bacteria<br>[Function unknown]; Region: COG3330                                                                                                                                                                                 |
| +(3821175.<br>.3821606) | 431  | 3.17516  | 134  | 54   | 80   | 0.19402985 | 0.00780868 | alr3156         | aphA              | alr3156, alr3156                                                                                                                                                                                                                                                                                               |
| +(4383426.<br>.4383866) | 440  | 1.288676 | 114  | 67   | 47   | 0.1754386  | 0.28731196 | avaIR<br>(630)  | avaIM             | avaIM, avaIM, S-adenosylmethionine-<br>dependent methyltransferases<br>(SAM or AdoMet-MTase), class I; AdoMet-<br>MTases are enzymes<br>that use S-adenosyl-L-methionine (SAM or<br>AdoMet) as a<br>substrate for methyltransfer, creating the<br>product<br>S-adenosyl-L-homocysteine (AdoHcy)...;<br>Region: |
| +(4539927.<br>.4540364) | 437  | 0.702288 | 57   | 31   | 26   | 0.0877193  | 0.14153347 | alr3757<br>(11) | alr3758           | alr3758, alr3758, Sulphate Transporter and<br>Anti-Sigma factor<br>antagonist) domain of anti-anti-sigma<br>factors, key<br>regulators of anti-sigma factors by<br>phosphorylation;<br>Region: STAS_anti-anti-sigma_factors;<br>cd07043, anti sigma factor interaction                                         |

|                         |     |          |     |     |    |            |            |                   |         |                                                                                                                                                                                                                                                                                                                                                                                                                                                                           |
|-------------------------|-----|----------|-----|-----|----|------------|------------|-------------------|---------|---------------------------------------------------------------------------------------------------------------------------------------------------------------------------------------------------------------------------------------------------------------------------------------------------------------------------------------------------------------------------------------------------------------------------------------------------------------------------|
| +(4740704.<br>.4741151) | 447 | 0.008364 | 199 | 119 | 80 | 0.1959799  | 0.00219011 | alr3926<br>(1150) | all3927 | all3927, all3927, Predicted GTPases (dynamain-related) [General function prediction only]; Region: COG0699, Era (E. coli Ras-like protein)-like. This family includes several distinct subfamilies (TrmE/ThdF, FeoB, YihA (EngG), Era, and EngA/YfgK) that generally show sequence conservation in the region between the Walker A and B motifs (G1 and G3 box motifs)...; Region: Era_like; cd00880, GTP/Mg2+ binding site; other site. Switch II region: other site. G4 |
| +(4857231.<br>.4857672) | 441 | 0.426777 | 120 | 71  | 49 | 0.18333333 | 0.88257483 | alr4031           | alr4032 | alr4031, alr4032, alr4031, alr4032, ABC-type Fe3+-hydroxamate transport system, periplasmic component [Inorganic ion transport and metabolism]; Region: FepB; COG0614, Transmembrane subunit (TM), of Periplasmic Binding Protein (PBP)-dependent ATP-Binding Cassette (ABC) transporters involved in the uptake of siderophores, heme, vitamin B12, or the divalent cations Mg2+ and Zn2+. PBP-dependent ABC transporters consist...; Region:                            |
| +(5064797.<br>.5065242) | 445 | 1.19299  | 53  | 31  | 22 | 0.16981132 | 0.47840662 | asr4228<br>(209)  | alr4229 | alr4229, alr4229, Uncharacterized conserved protein [Function unknown]; Region: COG1479, Protein of unknown function DUF262; Region: DUF262; pfam03235                                                                                                                                                                                                                                                                                                                    |
| +(5303024.<br>.5303480) | 456 | 0.537821 | 123 | 48  | 75 | 0.2195122  | 0.74985026 | all4423<br>(998)  | all4424 | all4424, all4425, all4424, all4425, Predicted glycosyltransferases [General function prediction only]; Region: COG1216                                                                                                                                                                                                                                                                                                                                                    |
| +(5309952.<br>.5310383) | 431 | 1.19299  | 51  | 13  | 38 | 0.49019608 | 6.9855E-06 | hlpA<br>(1327)    | all4430 | all4430, all4431, all4430, all4431, Predicted glycosyltransferases [General function prediction only]; Region: COG1216                                                                                                                                                                                                                                                                                                                                                    |

|                         |     |          |     |     |     |            |            |                  |                 |                                                                                                                                                                                                |
|-------------------------|-----|----------|-----|-----|-----|------------|------------|------------------|-----------------|------------------------------------------------------------------------------------------------------------------------------------------------------------------------------------------------|
| +(5350684.<br>.5351627) | 943 | 6.9E-62  | 395 | 174 | 221 | 0.11898734 | 0.27629633 | all4464<br>(480) | all4465         | all4465, all4465, Transposase and<br>inactivated derivatives [DNA<br>replication, recombination, and repair];<br>Region: COG0675, Probable transposase;<br>Region: Transposase_2;<br>pfam01385 |
| +(5355615.<br>.5356047) | 432 | 3.160056 | 213 | 109 | 104 | 0.02347418 | 0.2376336  | alr4469          | asr4470         | alr4469, asr4470, alr4469, asr4470,<br>Glyoxalase/Bleomycin resistance<br>protein/Dioxygenase<br>superfamily: Region: Glyoxalase: cl00411                                                      |
| +(6129044.<br>.6129475) | 431 | 4.436927 | 229 | 114 | 115 | 0.00436681 | 4.3185E-05 | all5131<br>(34)  | all5132<br>(22) |                                                                                                                                                                                                |
