# Supplementary material for: Deep sequencing of HetR-bound DNA reveals novel HetR targets in Anabaena sp. strain PCC7120
Source: PubMed Central journal article supplement (PMC4192349; doi:10.1186/s12866-014-0255-x), 2014-10-03
Supplement: 12866_2014_255_MOESM2_ESM.pdf [file 12866_2014_255_MOESM2_ESM.pdf]

**Additional Table 2. Putative HetR binding sites identified with FiMO.**

| ChIP Region      | Length | FDR (%)     | 5' gene   | 3' gene    | Binding site sequence                                                                                                                                                                                                                                     |
|------------------|--------|-------------|-----------|------------|-----------------------------------------------------------------------------------------------------------------------------------------------------------------------------------------------------------------------------------------------------------|
| 0136127..0136558 | 431    | 4.755638971 | all0131   | alr0132    | GCGGGTAATAACGC<br>AAGCGTTATTACCC<br>ATGGTTACAAATCA<br>ATGGGATTTTAGCA                                                                                                                                                                                      |
| 0613436..0613919 | 483    | 1.50628E-07 | patA      | alr0522    | TTGGCTCAAACCCA<br>ATGGGTTTGAGCCA                                                                                                                                                                                                                          |
| 1729122..1729569 | 447    | 0.133137459 | all1467   | alr1468    | ATGGGTATTACCAA<br>CTGGGTATTACCTT<br>ATTGGTAATACCCA                                                                                                                                                                                                        |
| 1732738..1733693 | 955    | 8.57576E-30 | asr1469   | alr1470    | AAGGCTAAAAACCC<br>GTGGGTTTTTAGCC<br>TTGGGCTAACTTA<br>TTGGATTTTTACCT                                                                                                                                                                                       |
| 1734763..1735224 | 461    | 0.313089483 | all1471   | all1472    | TTGTGATTAACCCCT                                                                                                                                                                                                                                           |
| 1788499..1788932 | 433    | 3.321759198 | alr1527   | none close | GTGTGTA AAAACCA<br>TTGGTTAATAACAA                                                                                                                                                                                                                         |
| 2427714..2428147 | 433    | 0.006270929 | all2026   | all2027    | CGGGGTAACAATCC<br>AAGGATTGTTACCC                                                                                                                                                                                                                          |
| 2691579..2692024 | 445    | 0.401937742 | all2239   | alr2240    | GTGGCTGATGACCT                                                                                                                                                                                                                                            |
| 2820376..2822006 | 678    |             | 0 alr2338 | hetR       | CCGGGTGCAGCCA<br>AAGGGTTTAACCTT<br>TGGGGACTTGACCA<br>CGGGGTGTTATCCT<br>ATGGGTGTATACCA<br>CCGGGTGCAGCCA<br>ACGGGTCAAAATCA<br>ATGGCTTCATCCA<br>GTTGGTATACACC<br>TTGGGGAATGCCCT                                                                              |
| 3431297..3432038 | 741    | 1.54167E-09 | hetC      | hetP       | AGGGGTC TAACCCC<br>AGGGGTTAGACCCC<br>CTGGGTACAATCCT<br>TGGGGAAAAACCAC<br>ATGGTTGCTTACCA<br>GTGGGGAAAAACCA<br>GTGGTTTTTCCCCA<br>AGTGGTTTTTCCCC<br>AAGGGTATAAACAG<br>GGGTGTCGTAACCC<br>AGGGGATTATAGCC<br>CTGGGTTACGACAC<br>TAGGATTGTACCCA<br>TAGCGTATAACTCA |
| 3627499..3627977 | 478    | 1.21738E-12 | alr2986   | alr2987    | ACGTGTAATACCCA                                                                                                                                                                                                                                            |
| 3695599..3696450 | 851    | 1.72525E-54 | asr3053   | all3054    | GCGGGTAGATATCC<br>TGGGGAATTGACAC<br>ATGGTAGCTTACCC                                                                                                                                                                                                        |
| 3821175..3821606 | 431    | 3.175160382 | alr3156   | aphA       | CTGGTTCTAACTCC                                                                                                                                                                                                                                            |
| 4383426..4383866 | 440    | 1.288675926 | avaIR     | avaIM      | TAGGGTTCAAATCT<br>ACGGGTATAGCTGA                                                                                                                                                                                                                          |
| 4539927..4540364 | 437    | 0.702287678 | alr3757   | alr3758    | TTGGGTA AACCTGC<br>AAGGGTTATTTCCT                                                                                                                                                                                                                         |
| 4740704..4741151 | 447    | 0.008364349 | alr3926   | all3927    | TTGGTTTTTCACCT                                                                                                                                                                                                                                            |
| 5064797..5065242 | 445    | 1.192989832 | asr4228   | alr4229    | AAGGGTTAAACTT                                                                                                                                                                                                                                             |
| 5303024..5303480 | 456    | 0.537820709 | all4424   | all4425    | AGTGGTATTACGCC                                                                                                                                                                                                                                            |
| 5309952..5310383 | 431    | 1.192989832 | all4430   | all4431    | ATGGGTGCAAGCCT                                                                                                                                                                                                                                            |
| 5355615..5356047 | 432    | 3.160055785 | alr4469   | asr4470    | AAGGGTTTCAAGCA<br>ATGCTTGAAACCTT<br>TGGGCTGAAGACCT                                                                                                                                                                                                        |
